# Supplementary material for: TP53 mutations as drivers of chordoma progression and hallmarks of aggressive chordoma
Source: Acta Neuropathol Commun. 2025 Dec 19;14:24. doi: 10.1186/s40478-025-02180-z (PMC12831397; doi:10.1186/s40478-025-02180-z)
Supplement: Supplementary file 1 — Supplementary material 1. [file 40478_2025_2180_MOESM1_ESM.xlsx]

## Sheet: Arkusz1
Supplementary Table. Sequences of PCR primers used for detection of TP53 variants with Sanger sequencing
TP53 variant	froward PCR primer	reverse PCR primer
p.R282W missense	GGTAATCTACTGGGACGGAAC	GCTTCTTGTCCTGCTTGCTT
p.E343* nonsense	GGCTGAGGTCACTCACCTGG	TTACTTCTCCCCCTCCTCTGT
c.559+1G>C splice donor site	AGGAGGGGCCAGACCTAAG	TGTGCAGCTGTGGGTTGATT
